# Supplementary material for: Usability of mobile applications: literature review and rationale for a new usability model
Source: Springer Nature journal article supplement (doi:10.1186/2194-0827-1-1), 2013-01-01
Supplement: 40166_2013_1_MOESM1_ESM.pdf [file 40166_2013_1_MOESM1_ESM.pdf]

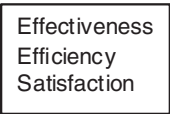

ISO

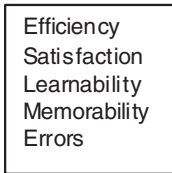

Nielsen

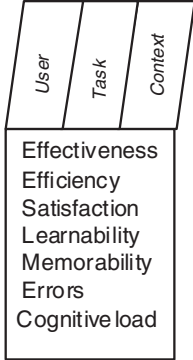

PACMAD
